# Supplementary material
Source: PubMed Central journal article supplement (PMC8404615)

## **Supplemental figures**

**Appendix S1. Additional phenotypic variables by anti-A titer.** Left column shows scatterplots of % naïve, % T<sub>CM</sub>, % T<sub>EM</sub> by anti-A titer with a best fit line by presence/absence of RBC contamination. Anti-A titer revealed no appreciable effect on naïve, T<sub>CM</sub>, or T<sub>EM</sub> percentage. Right column shows boxplots of % naïve, % T<sub>CM</sub>, % T<sub>EM</sub> by presence/absence of RBC contamination. P-values are shown within inset boxes on each respective boxplot.

**Appendix S2. Most upregulated and downregulated transcripts/pathways in cultures with RBC contamination**

**Appendix S3. Cytokine and chemokine expression in cultures with and without RBC contamination.** Hierarchical clustering showing 10 differently expressed analytes in cultures with and without RBC contamination. Violet and green lines on the tree represent cultures with and without 3% RBC spike, respectively.

**Appendix S4. RBC agglutination in cultures grown in the presence of high-titer O plasma.**

A) Macroscopic RBC agglutination is visible within the culture bag on day 7 in a culture supplemented with plasma containing an anti-A titer of 128. B) Microscopically, agglutination of intact RBCs (clustered, red, biconcave cells) is seen; lymphocytes (clear, round cells) continue to expand evenly across the field.

# Appendix S1

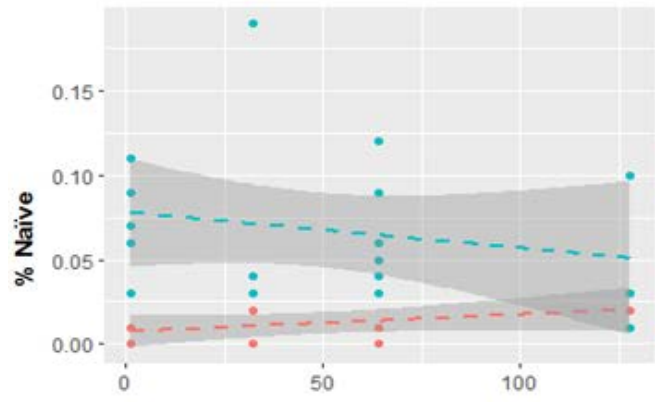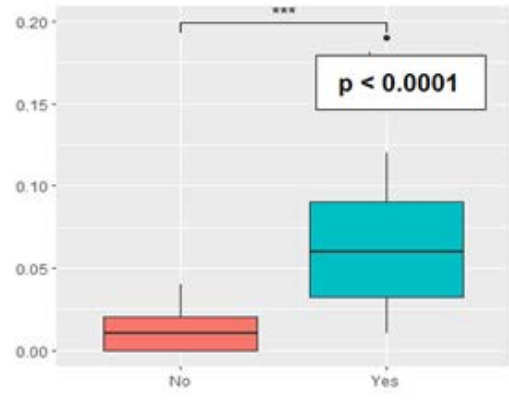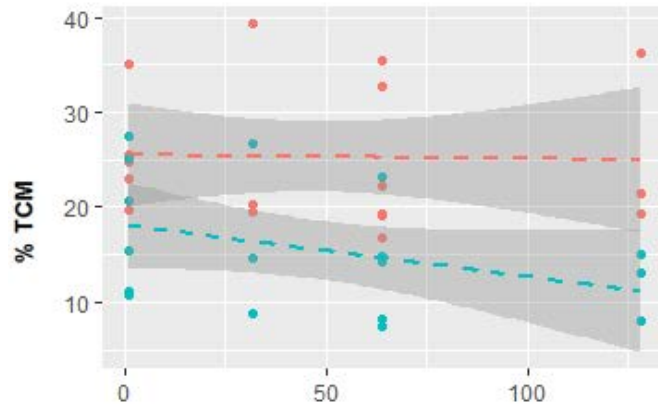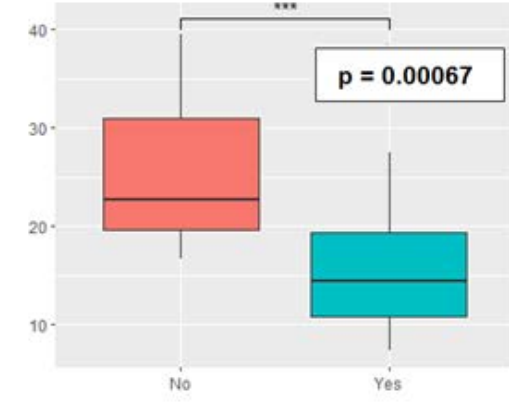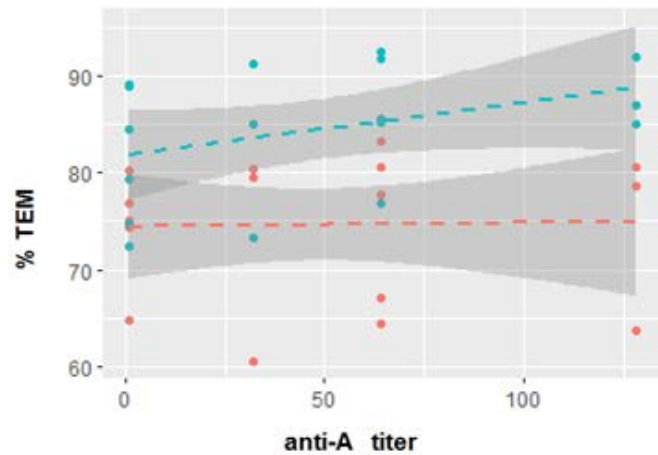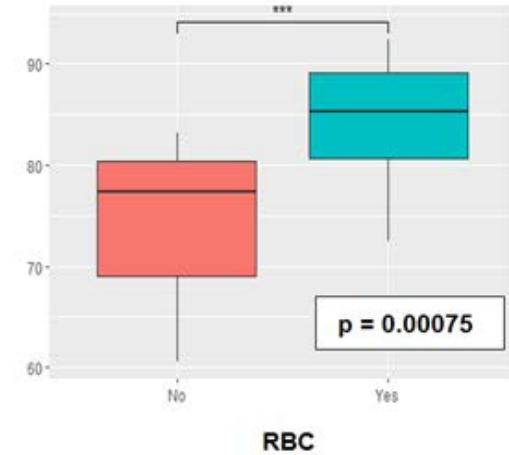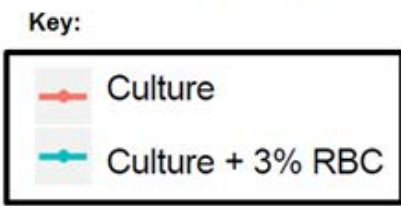

## Appendix S2

### Upregulated

Phagosome Maturation  
Activation of IRF by Cytosolic Pattern Recognition Receptors  
Endoplasmic Reticulum Stress Pathway  
Interferon Signaling  
Assembly of RNA Polymerase II Complex  
Estrogen Receptor Signaling  
Th1 and Th2 Activation Pathway  
Phosphatidylethanolamine Biosynthesis II  
EIF2 Signaling  
Eicosanoid Signaling  
Polyamine Regulation in Colon Cancer  
Th2 Pathway  
Clathrin-mediated Endocytosis Signaling  
Natural Killer Cell Signaling  
Mitochondrial Dysfunction  
Complement System  
Huntington's Disease Signaling  
Autophagy  
Assembly of RNA Polymerase I Complex  
Protein Ubiquitination Pathway  
Rac Signaling  
Tumoricidal Function of Hepatic Natural Killer Cells  
Glucocorticoid Receptor Signaling  
Hematopoiesis from Multipotent Progenitor Cells  
PI3K Signaling in B Lymphocytes  
B Cell Receptor Signaling  
Death Receptor Signaling  
Lipid Antigen Presentation by CD1  
Glycoaminoglycan-protein Linkage Region Biosynthesis  
NF- $\kappa$ B Activation by Viruses

### Downregulated

Cell Cycle Control of Chromosomal Replication  
Mismatch Repair in Eukaryotes  
Hereditary Breast Cancer Signaling  
tRNA Charging  
Role of BRCA1 in DNA Damage Response  
Cell Cycle: G2/M DNA Damage Checkpoint Regulation  
Superpathway of Cholesterol Biosynthesis  
Small Cell Lung Cancer Signaling  
Parkinson's Signaling  
Superpathway of Serine and Glycine Biosynthesis I  
Pyrimidine Deoxyribonucleotides De Novo Biosynthesis I  
Cholesterol Biosynthesis I  
Cholesterol Biosynthesis II (via 24,25-dihydrolanosterol)  
Cholesterol Biosynthesis III (via Desmosterol)  
DNA damage-induced 14-3-3 $\sigma$  Signaling  
Folate Transformations I  
Antiproliferative Role of TOB in T Cell Signaling  
Serine Biosynthesis  
dTMP De Novo Biosynthesis  
p53 Signaling  
ATM Signaling  
Epoxysqualene Biosynthesis  
Cysteine Biosynthesis/Homocysteine Degradation  
IL-4 Signaling  
Role of Tissue Factor in Cancer  
Mitotic Roles of Polo-Like Kinase  
Ovarian Cancer Signaling  
Pancreatic Adenocarcinoma Signaling  
Docosahexaenoic Acid (DHA) Signaling  
EGF Signaling

# Appendix S3

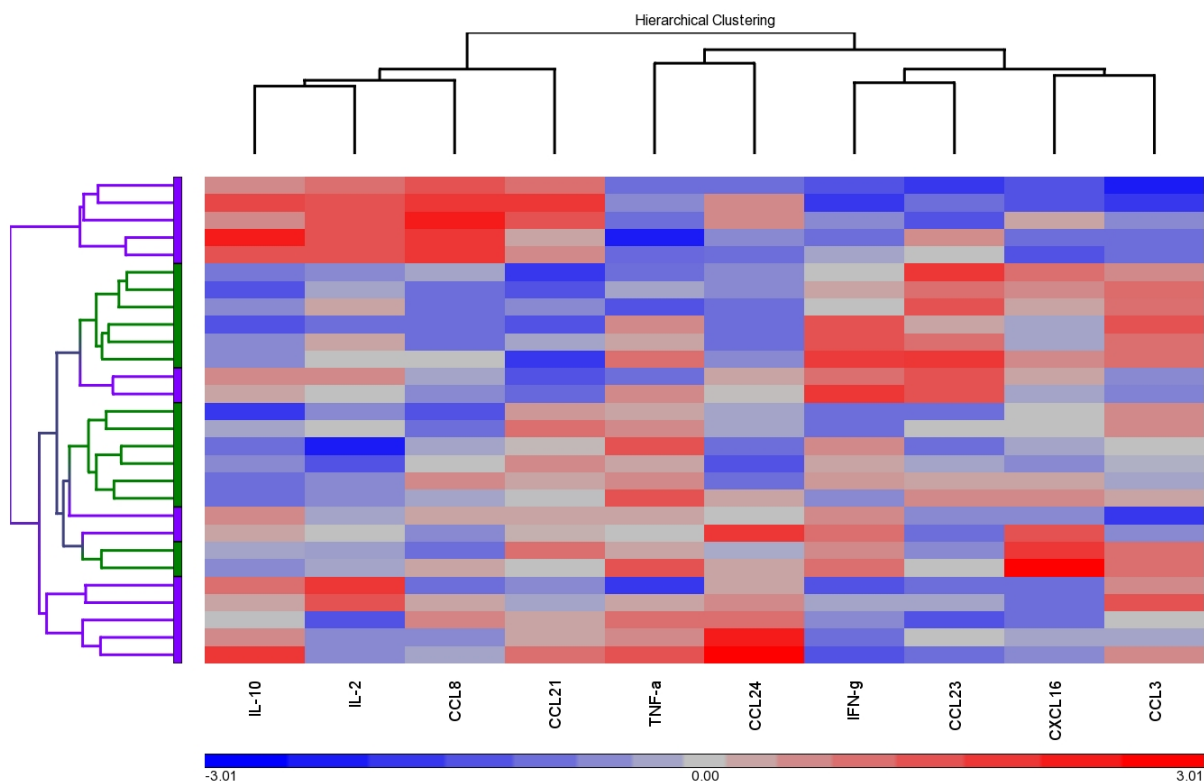

## Appendix S4

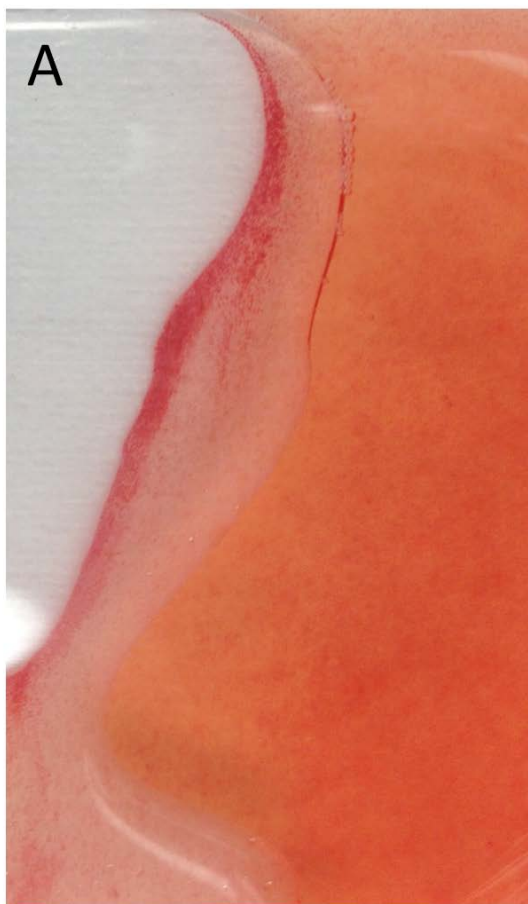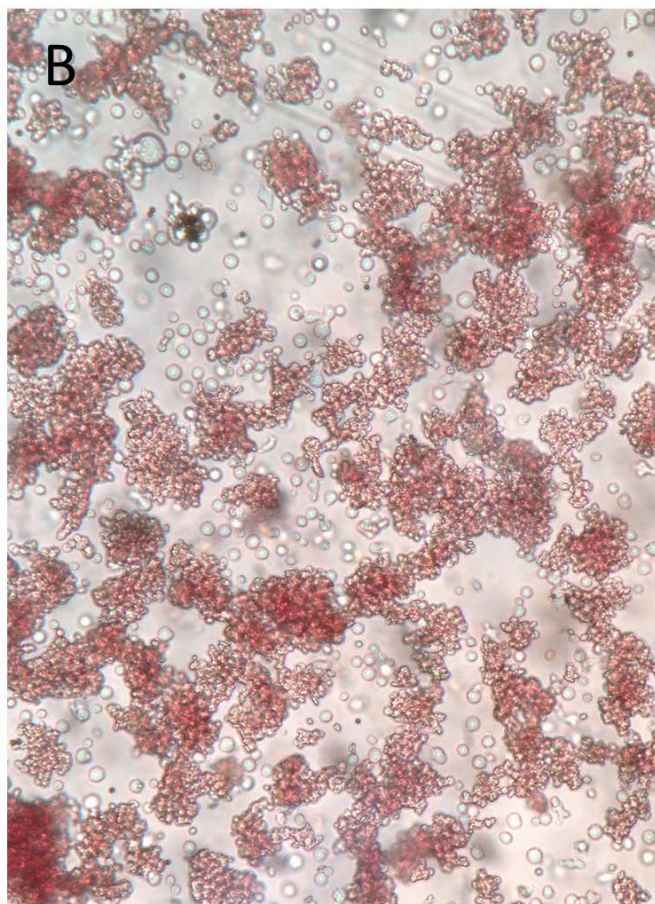

Supplement: NIHMS1733678-supplement-1.pdf [file NIHMS1733678-supplement-1.pdf]
